# Supplementary material for: Exploring the role of the nurse manager in supporting point-of-care nurses’ adoption of electronic health records: protocol for a qualitative research study
Source: PubMed Central journal article supplement — BMJ Open. 2017 Oct 12;7(10):e018129. doi: 10.1136/bmjopen-2017-018129 (PMC5652540; doi:10.1136/bmjopen-2017-018129), 2017-10-12
Supplement: bmjopen-2017-018129.draft_revisions.pdf [file bmjopen-2017-018129.draft_revisions.pdf]

# BMJ Open

BMJ Open is committed to open peer review. As part of this commitment we make the peer review history of every article we publish publicly available.

When an article is published we post the peer reviewers' comments and the authors' responses online. We also post the versions of the paper that were used during peer review. These are the versions that the peer review comments apply to.

The versions of the paper that follow are the versions that were submitted during the peer review process. They are not the versions of record or the final published versions. They should not be cited or distributed as the published version of this manuscript.

BMJ Open is an open access journal and the full, final, typeset and author-corrected version of record of the manuscript is available on our site with no access controls, subscription charges or pay-per-view fees (<http://bmjopen.bmj.com>).

If you have any questions on BMJ Open's open peer review process please email [editorial.bmjopen@bmj.com](mailto:editorial.bmjopen@bmj.com)

# BMJ Open

## Exploring the role of the nurse manager in supporting point of care nurses' adoption of electronic health records: Protocol for a qualitative research study

|                                 |                                                                                                                                                                                                   |
|---------------------------------|---------------------------------------------------------------------------------------------------------------------------------------------------------------------------------------------------|
| Journal:                        | <i>BMJ Open</i>                                                                                                                                                                                   |
| Manuscript ID                   | bmjopen-2017-018129                                                                                                                                                                               |
| Article Type:                   | Protocol                                                                                                                                                                                          |
| Date Submitted by the Author:   | 08-Jun-2017                                                                                                                                                                                       |
| Complete List of Authors:       | Strudwick, Gillian; Centre for Addiction and Mental Health, Information Management Group<br>Booth, Richard ; Western University<br>Bjarnadottir, Ragnhildur<br>Collins, Sarah<br>Srivastava, Rani |
| <b>Primary Subject Heading</b>: | Health informatics                                                                                                                                                                                |
| Secondary Subject Heading:      | Nursing, Mental health, Health services research, Qualitative research                                                                                                                            |
| Keywords:                       | MENTAL HEALTH, Health informatics < BIOTECHNOLOGY & BIOINFORMATICS, HEALTH SERVICES ADMINISTRATION & MANAGEMENT, QUALITATIVE RESEARCH                                                             |
|                                 |                                                                                                                                                                                                   |

SCHOLARONE™  
Manuscripts

Only

**BMJ Open Protocol****Title:**

Exploring the role of the nurse manager in supporting point of care nurses' adoption of electronic health records: Protocol for a qualitative research study

**Authors:**

Gillian Strudwick RN, PhD

Project Scientist, Information Management Group, Centre for Addiction and Mental Health,  
Toronto, Canada

Richard G. Booth RN, PhD

Assistant Professor, Arthur Labatt School of Nursing, Western University, London, Canada

Ragnhildur I. Bjarnadottir RN, MPH, PhD

Postdoctoral Associate, College of Nursing, University of Florida, Gainesville, USA

Sarah Collins RN, PhD

Senior Clinical and Nurse Informatician, Partners eCare and Instructor in Medicine, Harvard  
Medical School & Brigham and Women's Hospital, Boston, USA

Rani Srivastava RN, PhD

Chief of Nursing and Professional Practice, Centre for Addiction and Mental Health, Toronto,  
Canada

**Corresponding Author:**

Gillian Strudwick RN, PhD

Information Management Group, Centre for Addiction and Mental Health, Toronto, Canada  
Room 4265, 101 Stokes Street, Toronto, Ontario  
Gillian.strudwick@camh.ca  
416-535-8501 ext 39333

**Abstract:**

**Introduction:** An increasing number of electronic health record systems have been implemented in clinical practice environments where nurses work. Findings from previous studies have found that a number of intended benefits of the technology have not yet been realized to date, partially due to poor system adoption amongst health professionals such as nurses. Previous studies have suggested that nurse managers can support the effective adoption and use of the technology by nurses. However, no known studies have identified what role nurse managers have in supporting technology adoption, nor the specific strategies that managers can employ to support their staff. Therefore, the purpose of this research is to better understand the role of the nurse manager in point of care nurses' use of electronic health records, and to identify strategies that may be effective in supporting clinical adoption.

**Methods and Analysis:** This study will use a qualitative descriptive design. Interviews with both nurse managers and point of care nursing staff will be conducted in a Canadian mental health and addiction healthcare organization where an electronic health record has been implemented. A semi-structured interview guide will be used, and interviews will be audio recorded. Transcripts will be analyzed using a directed content analysis technique. Strategies to ensure the trustworthiness of the data analysis procedure and findings will be employed.

**Ethics and Dissemination:** Ethical approval for this study has been obtained. Dissemination strategies may include a paper submission to a peer-reviewed journal, a conference submission, and meetings to share findings with the study site leadership team. Findings from this research will be used to inform a future study which aims to assess levels of competencies and perform a psychometric analysis of the Nursing Informatics Competency Assessment for the Nurse Leader instrument in a Canadian context.

**Strengths and limitations of this study:**

- This is the first known study aimed at understanding the role of nurse managers, and identifying strategies that they can use to support point of care nurses' use of electronic health records
- Insights gained from this study can be used to inform future research that aims to examine the efficacy of specific strategies employed by nurse managers to support electronic health record adoption
- This study will be done at a single study site using a qualitative approach, and therefore the findings may not be generalizable

## INTRODUCTION

Electronic health records (EHRs) are repositories of patient information accessible by health professionals through information and communication technologies, and used for a number of health related functions.<sup>1</sup> These functions may include electronic documentation, clinical decision making support, electronic medication administration and computerized provider order entry. In the last decade, EHRs have been increasingly implemented in numerous healthcare environments.<sup>2-4</sup> Evaluation studies have been conducted to determine the benefits of EHRs and related technologies to patients, health professionals, and organizations.<sup>5-11</sup> Findings of this work suggest that simply installing and implementing an EHR in a clinical environment does not guarantee its success in generating intended benefits. A study by Simon et al. reported that for an EHR to be most effective, health professionals should use the technology in a consistent, appropriate, and uniform way.<sup>12</sup> As nurses make up the largest health professional group in many countries such as the United States<sup>13</sup> and Canada,<sup>14</sup> they may be the largest group of users of EHRs.<sup>15</sup> Therefore, understanding how to achieve consistent, appropriate, and uniform use of the technology by nurses is of importance.

### **Electronic Health Records within Mental Health and Addiction Settings**

While EHR implementations have continually grown in recent years, mental health and addiction settings lag behind other settings in adoption rates.<sup>16-18</sup> The causes of this disparity are not well understood. However, it may be partially explained by the unique needs and challenges of this population.<sup>17,18</sup> In contrast to acute care medical settings, mental health and addiction settings frequently structure their care based on a collaborative treatment and recovery model of care. This means that goals of treatment and needs for quality care monitoring may differ from other settings.<sup>18,19</sup> Consequently, customization may be required for EHRs to support care in this

1  
2  
3 setting. Additionally, concerns of stigma and patient confidentiality are substantial in this setting  
4  
5 and may be perceived as a further barrier to EHR implementation.<sup>17</sup> When EHRs are successfully  
6  
7 implemented in mental health and addiction settings, they have been demonstrated to improve  
8  
9 care coordination, facilitate quality assurance and improvement, support patient-centered  
10  
11 practice, and improve addiction treatment delivery.<sup>17,18,20</sup> Therefore, it is of particular importance  
12  
13 to examine how to achieve adequate use of EHR technology by nurses in this unique and  
14  
15 understudied setting.  
16  
17  
18

### 19 **Nurse' Adoption of Electronic Health Records:**

20  
21  
22 In the last decade, numerous studies have examined the factors that influence nurses'  
23  
24 adoption of EHRs. Findings of these studies have suggested that factors related to the EHR  
25  
26 usability,<sup>21-24</sup> the organizational context,<sup>25-27</sup> and individual nurse characteristics,<sup>28</sup> may influence  
27  
28 nurse' use of the technology. Specifically, several authors have discussed the importance of the  
29  
30 nurse manager (nursing managers who are also nurses themselves) in supporting nurses' use of  
31  
32 EHRs.<sup>11,29-31</sup> Nurse managers were described in these studies as being those that had point of  
33  
34 care nurses who directly reported to them. In Whittaker et al.'s study of barriers and facilitators  
35  
36 to nurses' use of an EHR, nurses reported that having a supportive manager was believed to  
37  
38 facilitate their use of the system.<sup>30</sup> Yang and colleagues report that nurse managers are well  
39  
40 positioned to provide leadership and support to point of care nurses in their use of EHRs.<sup>31</sup> Each  
41  
42 author has identified that nurse managers play a critical role in the successful adoption and use of  
43  
44 the technology for point of care nurses. However, none of the authors identified what role nurse  
45  
46 manager's play in providing support, and the related effectiveness of implemented strategies.  
47  
48  
49  
50  
51 Therefore, this research will seek to identify the role of nurse managers in providing support, in  
52  
53  
54  
55  
56  
57  
58  
59  
60

1  
2  
3 order to enhance point of care nurses' adoption of EHRs in organizations that currently have  
4  
5 EHRs implemented.  
6  
7

8 This study is important as no known studies have explored this topic in the past, and there  
9  
10 is expected to be an increasing number of EHRs implemented in organizations where nurses  
11  
12 work in the coming decade. Research that aims to identify the role of nurse managers in  
13  
14 providing EHR support, and what type of support is effective, may allow for interventions to be  
15  
16 developed and researched that enhance point of care nurses' adoption of EHRs. It is possible that  
17  
18 benefits of the technology may be realized when nurses are adequately supported, and are able to  
19  
20 effectively use the systems in their work.  
21  
22  
23

## 24 **METHODS AND ANALYSIS**

### 25 **Research Questions:**

26  
27 Given that there has been little research to date examining the role that nurse managers  
28  
29 play in supporting point of care nurses' adoption and use of EHRs, the authors aim to address the  
30  
31 following research questions:  
32  
33  
34

- 35  
36 1) What role do nurse managers play in supporting point of care nurses' adoption of  
37  
38 electronic health records?  
39  
40 2) What strategies have nurse managers used to support point of care nurses use of  
41  
42 electronic health records, and how do point of care nurses perceive these strategies?  
43  
44  
45

### 46 **Theoretical Framework:**

47  
48 This study will draw upon the Staggers and Parks Nurse-Computer Interaction  
49  
50 Framework (SPNCIF).<sup>32</sup> The SPNCIF was developed by nursing informatics researchers in the  
51  
52 United States, and has been used in the study of nurses' adoption of EHRs to identify relevant  
53  
54 contextual, system/usability and individual nurse characteristics that may influence nurses'  
55  
56  
57  
58  
59  
60



1  
2  
3 adoption of the technology.<sup>30,32,33</sup> Given that SPNFIC has been found to be useful in identifying  
4  
5 barriers and facilitators of EHR adoption in previous research,<sup>30</sup> the framework will provide a  
6  
7 structure by which strategies identified by nurse managers and point of care nursing staff to  
8  
9 support nurse use of these systems can be understood. In this study, the SPNCIF will be used to  
10  
11 guide both data collection and analysis, given that supports provided by nurse managers may be  
12  
13 attributed to the three domains of the framework (contextual, system/usability, individual nurse  
14  
15 characteristics).  
16  
17  
18  
19

### 20 **Design:**

21  
22 This study will employ a qualitative descriptive approach<sup>34</sup> consisting of semi-structured  
23  
24 individual interviews with both nurse managers and point of care nursing staff.  
25  
26

### 27 **Sample:**

28  
29 The sample of participants in this study will consist of both nurse managers and point of  
30  
31 care nursing staff. Nurse managers are considered those who directly supervise and oversee point  
32  
33 of care nursing staff in a particular care setting. These managers may be responsible for both  
34  
35 administrative and clinical tasks such as hiring, managing, scheduling and disciplining nursing  
36  
37 staff, promoting the use of best practice, and managing patient and family feedback. There are a  
38  
39 number of job titles that nurse managers may have, including: 'nursing unit administrator',  
40  
41 'nurse manager', 'unit manager', 'nursing director' and others.  
42  
43  
44  
45

46 Point of care nursing staff are defined in this study as those who provide direct care to  
47  
48 patients as either registered nurses or registered/licensed practical nurses. Nurses working in  
49  
50 advanced practice roles, such as nurse practitioners and clinical nurse specialists will be excluded  
51  
52 from this study given their differing work patterns, and use of the EHR. Participants (nurse  
53  
54 managers and point of care nursing staff) who have been in their roles for a minimum of one year  
55  
56  
57  
58  
59  
60

1  
2  
3 will be eligible to participate in the study. This criterion was set to ensure that only those  
4  
5 participants who are familiar with their own roles as either a nurse manager or point of care  
6  
7 nursing staff are included in this study.  
8  
9

10  
11 Typical case sampling, a sub-set of purposive sampling, will be used to ensure that  
12  
13 participants are typical of the age range, education, and work experience of nurse managers and  
14  
15 point of care staff employed at the organization.<sup>35</sup> This will also be done to ensure that a range of  
16  
17 participant responses are captured during the interviews that represent those of the average nurse  
18  
19 manager or point of care nurse. Information on nurse manager and point of care nurse age,  
20  
21 education and work experience will be obtained through internal organizational documents and  
22  
23 resources. This information will be used to select an appropriate sample of participants.  
24  
25  
26

27  
28 Interviews with participants will be conducted until data saturation has been obtained. In  
29  
30 a previous study aimed at identifying the barriers and facilitators to point of care nurses' use of  
31  
32 an EHR, data saturation was achieved after eleven point of care nurses had been interviewed.<sup>30</sup> It  
33  
34 is therefore expected that between ten and twelve interviews will be conducted for each group  
35  
36 (nurse managers and point of care staff) totaling twenty to twenty-four interviews. However, it is  
37  
38 possible that a lesser or greater number of participants is required to reach data saturation in this  
39  
40 study.  
41  
42

#### 43 **Setting:**

44  
45 This study will be conducted at a large mental health organization in an urban setting in  
46  
47 Ontario, Canada. This organization has implemented a comprehensive EHR with several  
48  
49 common functionalities including computerized provider order entry, electronic medication  
50  
51 administration, barcode medication administration, clinical documentation, and laboratory and  
52  
53 results reporting and viewing. The EHR has been implemented throughout the organization, and  
54  
55  
56  
57  
58  
59  
60

1  
2  
3 nurses use the system to obtain information, make decisions and document assessments and care  
4 provided. Point of care nursing staff receive two days of training on the EHR, while nurse  
5  
6 managers receive varying amounts of training ranging from none to two days. The particular  
7  
8 EHR in place was developed by an external vendor, and is present in a number of healthcare  
9  
10 organizations both locally and internationally. Customizations for particular fields and forms  
11  
12 have been made to the EHR at the study site, however the design and functionality remain  
13  
14 similar to those implemented at other organizations with the same vendor.  
15  
16  
17  
18

### 19 20 **Recruitment and Data Collection:**

21  
22 Participants in this study will be recruited via an email invitation that informs potential  
23  
24 participants of the study purpose, details of participating, and voluntary nature of the study. If  
25  
26 the potential participant is in agreement, the researcher will coordinate a date, time and place for  
27  
28 the interview to take place. The research team will send a copy of the informed consent letter via  
29  
30 email for the potential participant to read ahead of time. Once the research team and potential  
31  
32 participant meet to conduct the interview, the research team will inform the potential participant  
33  
34 again about the purpose of the study, details of participating, and the voluntary nature of the  
35  
36 study. There will be time for the potential participant to ask questions of the researcher during  
37  
38 this time. Lastly, the informed consent letter will be signed before the interview begins.  
39  
40  
41  
42

43  
44 Semi-structured interview guides specific to each group of participants (nurse manager or  
45  
46 point of care nursing staff), have been developed (see Table 1 and 2).  
47  
48  
49  
50  
51  
52  
53  
54  
55  
56  
57  
58  
59  
60

Table 1

## Semi-Structured Interview Guide for Managers

|                                                                                                                                                                                                                                                                                                                                                                                                                                                                                                                                                                                                                                         |                                                                                                                                                                                                                                                                                              |
|-----------------------------------------------------------------------------------------------------------------------------------------------------------------------------------------------------------------------------------------------------------------------------------------------------------------------------------------------------------------------------------------------------------------------------------------------------------------------------------------------------------------------------------------------------------------------------------------------------------------------------------------|----------------------------------------------------------------------------------------------------------------------------------------------------------------------------------------------------------------------------------------------------------------------------------------------|
| <p>Welcome and thank you for agreeing to participate in this study.</p> <p>The purpose of the study is to examine the role that nurse managers play in supporting point of care nurses' use and adoption of electronic health records such as [name of EHR].</p> <p>During this interview, you will be asked to share your perspective as a manager. Please do not discuss anything that was said today outside of this interview. As well, this interview will be audio recorded, however no identifying information such as your name, will be transcribed from the recordings.</p> <p>Do you have any questions before we begin?</p> |                                                                                                                                                                                                                                                                                              |
| Question 1                                                                                                                                                                                                                                                                                                                                                                                                                                                                                                                                                                                                                              | What do you believe your role is in providing support to point of care nurses in their use of [name of EHR]?                                                                                                                                                                                 |
| Question 2                                                                                                                                                                                                                                                                                                                                                                                                                                                                                                                                                                                                                              | What strategies have you used to support point of care nurses' use of [name of EHR]?                                                                                                                                                                                                         |
| Question 3                                                                                                                                                                                                                                                                                                                                                                                                                                                                                                                                                                                                                              | Can you describe for me which strategies that you have used that <u>have been</u> particularly effective in supporting nurses' use of [name of EHR]?                                                                                                                                         |
| Question 4                                                                                                                                                                                                                                                                                                                                                                                                                                                                                                                                                                                                                              | Can you describe for me which strategies that you have used that have <u>not been</u> effective in supporting nurses' use of [name of EHR]?                                                                                                                                                  |
| Question 5                                                                                                                                                                                                                                                                                                                                                                                                                                                                                                                                                                                                                              | <p>Are there other strategies that you would like to do to support point of care nurses' use of [name of EHR]?</p> <p><u>Follow-up:</u> How come? How come you have not been able to implement this strategy thus far? What might it take for you to be able to implement this strategy?</p> |
| Question 6                                                                                                                                                                                                                                                                                                                                                                                                                                                                                                                                                                                                                              | Is there anything else you would like to share with me about your support of point of care nurses' use of [name of EHR]?                                                                                                                                                                     |
| <p>Thank you for participating in this interview. Everything that was said today will remain confidential.</p>                                                                                                                                                                                                                                                                                                                                                                                                                                                                                                                          |                                                                                                                                                                                                                                                                                              |

Table 2

## Semi-Structured Interview Guide for Point of care Nurses

|                                                                                                                                                                                                                                                                                                                                                                                                                                                                                                                                                                                                                                                     |                                                                                                                                                              |
|-----------------------------------------------------------------------------------------------------------------------------------------------------------------------------------------------------------------------------------------------------------------------------------------------------------------------------------------------------------------------------------------------------------------------------------------------------------------------------------------------------------------------------------------------------------------------------------------------------------------------------------------------------|--------------------------------------------------------------------------------------------------------------------------------------------------------------|
| <p>Welcome and thank you for agreeing to participate in this study.</p> <p>The purpose of the study is to examine the role that nurse managers play in supporting point of care nurses' use and adoption of electronic health records such as [name of EHR].</p> <p>During this interview, you will be asked to share your perspective as a point of care nurse. Please do not discuss anything that was said today outside of this interview. As well, this interview will be audio recorded, however no identifying information such as your name, will be transcribed from the recordings.</p> <p>Do you have any questions before we begin?</p> |                                                                                                                                                              |
| Question 1                                                                                                                                                                                                                                                                                                                                                                                                                                                                                                                                                                                                                                          | What do you believe your managers' role is in providing support to point of care nurses in their use of [name of EHR]?                                       |
| Question 2                                                                                                                                                                                                                                                                                                                                                                                                                                                                                                                                                                                                                                          | What strategies has your manager used to support point of care nurses' use of [name of EHR]?                                                                 |
| Question 3                                                                                                                                                                                                                                                                                                                                                                                                                                                                                                                                                                                                                                          | Can you describe for me which strategies that your manager has used that <u>have been</u> particularly effective in supporting nurses' use of [name of EHR]? |
| Question 4                                                                                                                                                                                                                                                                                                                                                                                                                                                                                                                                                                                                                                          | Can you describe for me which strategies your manager has used that have <u>not been</u> effective in supporting nurses' use of [name of EHR]?               |
| Question 5                                                                                                                                                                                                                                                                                                                                                                                                                                                                                                                                                                                                                                          | Are there other strategies that you would like to see your manager use to support your use of [name of EHR]?                                                 |
| Question 6                                                                                                                                                                                                                                                                                                                                                                                                                                                                                                                                                                                                                                          | Is there anything else you would like to share with me about your managers support of point of care nurses' use of [name of EHR]?                            |
| <p>Thank you for participating in this interview. Everything that was said today will remain confidential.</p>                                                                                                                                                                                                                                                                                                                                                                                                                                                                                                                                      |                                                                                                                                                              |

1  
2  
3  
4  
5  
6  
7  
8  
9  
10  
11  
12  
13  
14  
15  
16  
17  
18  
19  
20  
21  
22  
23  
24  
25  
26  
27  
28  
29  
30  
31  
32  
33  
34  
35  
36  
37  
38  
39  
40  
41  
42  
43  
44  
45  
46  
47  
48  
49  
50  
51  
52  
53  
54  
55  
56  
57  
58  
59  
60

These interview guides were developed based on relevant literature, the theoretical framework, and the research questions in this study. Each interview guide consists of six open-ended questions. Participants will also be asked to provide the type of nursing registration they hold (registered nurse or registered/licensed practical nurse), years of experience using the EHR, and years of experience working as a mental health nurse. It is expected that interviews will take approximately between 20 and 45 minutes depending on the amount of detail provided by the participant. By using a semi-structured interview approach, all participants will be guided through the same sets of questions, however the interviewer will have the opportunity to probe further when required to gain a deeper understanding of the participant's perspectives.

Interviews will be audio recorded and transcribed verbatim via an external transcription service with appropriate data security measures in place. No names will be transcribed; instead pseudonyms will be used. Once the study has been completed, the original audio recording will be deleted. The audio recorder will be kept in a locked filing cabinet in a locked room. The transcriptions will be kept in an internal electronic secure folder only accessible by the principal investigator.

### **Analysis:**

Interview data transcriptions will be entered into NVivo qualitative data analysis software (QSR International Pty Ltd. Version 11, 2014). Data analysis will be completed via a directed content analysis<sup>36</sup> based on the domains from the Staggers and Parks Nurse-Computer Interaction Framework. This is an appropriate technique given that the framework was used to guide the study methodology, and semi-structured interview guide. Pre-determined codes will be developed based on these domains. Two members of the research team will first independently apply these codes to the interview data. These team members will then meet to compare and

1  
2  
3 contrast their findings. Where disagreements in the applied coding are discovered, the two  
4  
5 research team members will discuss the emergent coding and come to a consensus regarding its  
6  
7 interpretation. If consensus cannot be achieved by the two research team members, the entire  
8  
9 research team will be involved in analyzing the data and coming to agreement regarding the  
10  
11 proper code to associate to a particular set of data. Data that cannot be attributed to a pre-  
12  
13 determined code will be subject to open coding through an inductive analysis process. During  
14  
15 this time, new codes may be generated to represent findings that did not apply to the pre-  
16  
17 determined codes.  
18  
19  
20  
21

### 22 **Trustworthiness:**

23  
24 The authors will take several measures to conduct a credible and trustworthy study.<sup>37</sup>  
25  
26 First, experts in both the subject area and qualitative research methods have assisted in the  
27  
28 conceptualization and development of the study protocol. Second, direct quotes arising from  
29  
30 participants will be used to demonstrate alignment to the Staggers and Parks Nurse-Computer  
31  
32 Interaction Framework domains, and serve as a method to increase credibility of analysis. To  
33  
34 improve the dependability and trustworthiness of the analysis process, two members of the  
35  
36 research team will remain embedded in the data and independently code the raw data to the  
37  
38 framework. Member-checking with two nurse managers and two point of care staff members  
39  
40 who participated in the study will also be completed to ensure credibility and meaning were  
41  
42 captured appropriately within the preliminary analysis.  
43  
44  
45  
46  
47

### 48 **ETHICAL CONSIDERATIONS**

49  
50 This study is considered to be of low risk, and the participants are not considered  
51  
52 vulnerable. Ethical approval (2016-17.117) has been obtained from the organization in which  
53  
54 this study will take place.  
55  
56  
57  
58  
59  
60

## DISCUSSION AND DISSEMINATION

The proposed study is significant for several reasons: 1) it examines the role of nurse managers in supporting point of care nurses' use of EHRs, which is currently unclear in the literature and in practice environments, and 2) it is the first study to allow for the identification of strategies that nurse managers can implement to support effective EHR implementation and adoption by point of care nurses. Results of this study will be of value to nurse managers and hospital leaders who have, or plan to implement an EHR in their clinical environment. Therefore the authors plan to pursue dissemination strategies that are targeted at nurse managers and hospital leaders through an academic peer-reviewed journal article submission. A journal that focuses on the topic of nursing management, administration or leadership will be selected. In addition to a journal article, the authors plan to submit an abstract for a presentation at the Nursing Leadership Network of Ontario annual conference. This conference is an appropriate forum as the attendees are made up of nurse managers, administrators and leaders. In addition, the findings from this research will be shared with the senior leadership team at the study site.

The results of this research will be used to develop a future study which aims to: 1) assess levels of informatics competencies of nurse leaders, and 2) perform a psychometric analysis of the Nursing Informatics Competency Assessment for the Nurse Leader (NICA-NL) instrument in a Canadian context. The NICA-NL is a self-assessment instrument that can be used by nurse leaders (inclusive of nurse managers) to evaluate their level of nursing informatics competencies.<sup>38</sup> Information obtained from this future study in combination with findings from the present study, can be used to identify areas where Canadian resources may be created to support the development of specific informatics competencies for nurse leaders, inclusive of nurse managers.



**Conclusion:**

This research will make an important contribution to the nursing informatics literature in that it will be the first study aimed at better understanding the role of the nurse manager in point of care nurses' adoption of EHRs, and what strategies are effective. End-of-study dissemination strategies of the research results have therefore been planned to inform relevant stakeholder groups of the study findings. In addition, the results will be used to develop a future research study which aims to assess levels of competencies and perform a psychometric analysis of NICA-NL in a Canadian context.

1  
2  
3  
4  
5  
6 **Authors Contributions:** GS, RGB and RIB conceptualized the study. Modifications to the study  
7  
8 were made based on the feedback obtained from SC and RS. GS drafted the manuscript and all  
9  
10 authors made contributions to its development. All authors reviewed and approved the final  
11  
12 manuscript.  
13

14  
15  
16  
17 **Funding statement:** Funding for this work was obtained from the Nursing Leadership Network  
18  
19 of Ontario, and the Nursing Research Interest Group of the Registered Nurses' Association of  
20  
21 Ontario.  
22  
23

24  
25  
26  
27 **Competing interests statement:** The authors declare that they have no conflict of interest.  
28  
29

30  
31 **Acknowledgements:** The authors want to thank Iman Kassam for her help in formatting this  
32  
33 manuscript.  
34  
35  
36  
37  
38  
39  
40  
41  
42  
43  
44  
45  
46  
47  
48  
49  
50  
51  
52  
53  
54  
55  
56  
57  
58  
59  
60

## References

1. Hayrinen K, Saranto K, Nykanen P. Definition, structure, content, use and impacts of electronic health records: A review of the research literature. *Int J Med Inf.* 2008;77 (5): 291-304.
2. Canada Health Infoway [Internet]. Progress in Canada; c2017 [cited 2017]. Available from <https://www.infoway-inforoute.ca/en/what-we-do/progress-in-canada>
3. Charles D, Gabriel M, Searcy T. Adoption of electronic health record systems among U.S. non-federal acute care hospitals: 2008-2014. Office of the National Coordinator for Health Information Technology. 2015;23:1-10.
4. The Commonwealth Fund [Internet]. What is the status of electronic health records; c2017 [cited 2017]. Available from <http://international.commonwealthfund.org/features/ehrs/>
5. Bjarnadottir RI, Herzig CT, Travers JL, Castle NG, Stone PW. Implementation of electronic health records in U.S. nursing homes. *Comput Inform Nurs.* 2017. Epub 2017.
6. Bowman S. Impact of electronic health record systems on information integrity: Quality and safety implications. *Perspect Health Inf Manag.* 2013 Fall;10:1c.
7. Chaudhry B, Wang J, Wu S, Magilone M, Mojica W, Roth E, Morton SC, Shekelle PG. Systematic review: Impact of health information technology on quality, efficiency, and costs of medical care. *Ann of Intern Med.* 2006;144(10):742-52.
8. Campanella P, Lovato E, Marone C, Fallacara L, Mancuso A, Ricciardi W, Specchia ML. The impact of electronic health records on healthcare quality: A systematic review and meta-analysis. *Eur J Public Health.* 2015;26(1):60-4.

- 1  
2  
3 9. Koppel R, Wetterneck TB, Telles JL, Karsh B. Workarounds to barcode medication  
4  
5 administration systems: their occurrences, causes, and threats to patient safety. *J Am Med*  
6  
7 *Inform Assoc.* 2008;15:408-23.  
8  
9
- 10 10. Patterson ES, Rogers ML, Chapman RJ, Render MI. Compliance with intended use of bar  
11  
12 code medication administration in acute and long-term care: an observational study. *Hum*  
13  
14 *Factors.* 2006;48:15-22.  
15  
16
- 17 11. Poissant L, Pereira J, Tmablyn R, Kawasumi Y. The impact of electronic health records on  
18  
19 time efficiency of physicians and nurses: a systematic review. *J Am Med Inform Assoc.*  
20  
21 2005;12(5):505-16.  
22  
23
- 24 12. Simon SR, Kaushal R, Cleary PD, Jenter CA, Volk LA, Orav EJ, et al. Physicians and  
25  
26 electronic health records: A statewide survey. *Arch of Intern Med.* 2007;167(5):507-12.  
27  
28
- 29 13. American Association of Colleges of Nursing [Internet]. Nursing Fact Sheet; c2011 [cited  
30  
31 2017]. Available from [http://www.aacn.nche.edu/media-relations/fact-sheets/nursing-](http://www.aacn.nche.edu/media-relations/fact-sheets/nursing-fact-sheet)  
32  
33 [fact-sheet](http://www.aacn.nche.edu/media-relations/fact-sheets/nursing-fact-sheet).  
34  
35
- 36 14. Canadian Nurses Association [Internet]. Framework for the Practice of Registered Nurses in  
37  
38 Canada; c2015 [cited 2017]. Available from [https://www.cna-aiic.ca/~media/cna/page-](https://www.cna-aiic.ca/~media/cna/page-content/pdf-en/framework-for-the-practice-of-registered-nurses-in-canada.pdf?la=en)  
39  
40 [content/pdf-en/framework-for-the-practice-of-registered-nurses-in-canada.pdf?la=en](https://www.cna-aiic.ca/~media/cna/page-content/pdf-en/framework-for-the-practice-of-registered-nurses-in-canada.pdf?la=en).  
41  
42
- 43 15. Kutney-Lee A, Kelly D. The effect of hospital electronic health record adoption on nurse-  
44  
45 assessed quality of care and patient safety. *J Nurs Adm.* 2011;41(11):466-72.  
46  
47
- 48 16. The Office of the National Coordinator for Health Information Technology [Internet]. Data  
49  
50 Brief; c2017[cited 2017]. Available from [/evaluations/data-briefs/non-federal-acute-care-](/evaluations/data-briefs/non-federal-acute-care-hospital-ehr-adoption-2008-2015.php)  
51  
52 [hospital-ehr-adoption-2008-2015.php](/evaluations/data-briefs/non-federal-acute-care-hospital-ehr-adoption-2008-2015.php)  
53  
54  
55  
56  
57  
58  
59  
60

- 1  
2  
3 17. McGregor B, Mack D, Wrenn G, Shim RS, Holden K, Satcher D. Improving service  
4  
5 coordination and reducing mental health disparities through adoption of electronic health  
6  
7 records. *Psychiatr Serv*. 2016;66(9): 985-7.  
8  
9
- 10 18. Riahi S, Fischler I, Stuckey MI, Klassen PE, Chen J. The value of electronic medical record  
11  
12 implementation in mental health care: A case study. *JMIR Med Inform*. 2017;5(1).  
13  
14
- 15 19. Oades LG, Deane F, Crowe T, Lambert WG, Kavanagh D, Lloyd C. Collaborative recovery:  
16  
17 an integrative model for working with individuals who experience chronic and recurring  
18  
19 mental illness. *Australas Psychiatry*. 2005;13(3):279-84.  
20  
21
- 22 20. Ghitza UE, Sparenborg S, Tai B. Improving drug abuse treatment delivery through adoption  
23  
24 of harmonized electronic health record systems. *Subst Abuse and Rehabil*. 2011;2:125-31.  
25  
26
- 27 21. Ammenwerth E, Ehlers F, Hirsch B, Gratl G. HIS-Monitor: An approach to assess the quality  
28  
29 of information processing in hospitals. *Int J Med Inf*. 2006;76:216-25.  
30  
31
- 32 22. Carayon P, Cartmill R, Blosky M, Brown R, Hackenberg M, Hoonakker P, et al. ICU nurses'  
33  
34 acceptance of electronic health records. *J Am Med Inform Assoc*. 2011;18:812-9.  
35  
36
- 37 23.. Carrington JM, Effken JA. Strengths and limitations of the electronic health record for  
38  
39 documenting clinical events. *Comput Inform Nurs*. 2011;29(6):360-7.  
40  
41
- 42 24. Schenk EC, Mayer DM, Ward-Barney E, Estill P, Goss L, Shreffler-Grant J. RN perceptions  
43  
44 of a newly adopted electronic health record. *J Nurs Adm*. 2016;46(3):139-45.  
45  
46
- 47 25. Lu CH, Hsiao JL, Chen RF. Factors determining nurse acceptance of hospital information  
48  
49 systems. *Comput Inform Nurs*. 2012;30(5)-257-64.  
50  
51
- 52 26. Maillet E, Mathieu L, Sicotte C. Modeling factors explaining the acceptance, actual use and  
53  
54 satisfaction of nurses using an electronic patient record in acute care settings: An  
55  
56 extension of the UTAUT. *Int J Med Inf*. 2015;84:36-47.  
57  
58  
59  
60

- 1  
2  
3  
4  
5  
6  
7  
8  
9  
10  
11  
12  
13  
14  
15  
16  
17  
18  
19  
20  
21  
22  
23  
24  
25  
26  
27  
28  
29  
30  
31  
32  
33  
34  
35  
36  
37  
38  
39  
40  
41  
42  
43  
44  
45  
46  
47  
48  
49  
50  
51  
52  
53  
54  
55  
56  
57  
58  
59  
60
27. Saleem JJ, Plew WR, Speir RC, Herout J, Wilck NR, Ryan DM, et al. Understanding barriers and facilitators to the use of clinical information systems for intensive care units and anesthesia record keeping: A rapid ethnography. *Int J Med Inf.* 2015;84:500-11.
28. Ifinedo P. The moderating effects of demographic and individual characteristics on nurses' acceptance of information systems: A canadian study. *Int J Med Inf.* 2016;87:27-35.
29. Ash JS, Bates DW. Factors and forces affecting EHR system adoption: report of a 2004 ACMI discussion. *J Am Med Inform Assoc.* 2005;12:8-12.
30. Whittaker AA, Aufdenkamp M, Tinley S. Barriers and facilitators to electronic documentation in a rural hospital. *J Nurs Scholarsh.* 2009;41(3):293-300.
31. Yang L, Cui D, Zhu X, Zhao Q, Xiao N, Shen N. Perspectives from nurse managers on informatics competencies. *Scientific World Journal.* 2014.
32. Staggers N, Parks N. Description and initial applications of the staggers and parks nurse-computer interaction framework. *Comput Inform Nurs.* 1993;11(6):282-90.
33. Staggers N, Kobus D. Comparing response time, errors, and satisfaction between text-based and graphical user interfaces during nursing order tasks. *J Am Med Inform Assoc.* 2000;7(2):164-76.
34. Sandelowski M. Whatever happened to qualitative description? *Res Nurs Health.* 2000;23(4):334-40.
35. Palinkas L.A, Horwitz SM, Green CA, Wisdom JP, Duan N, Hoagwood K. Purposeful sampling for qualitative data collection and analysis in mixed method implementation research. *Adm Policy Ment Health.* 2015;42(5):533-44.
36. Hsieh H, Shannon SE. Three approaches to qualitative content analysis. *Qual Health Res.* 2005;15(9):1277-88.

- 1  
2  
3  
4  
5  
6  
7  
8  
9  
10  
11  
12  
13  
14  
15  
16  
17  
18  
19  
20  
21  
22  
23  
24  
25  
26  
27  
28  
29  
30  
31  
32  
33  
34  
35  
36  
37  
38  
39  
40  
41  
42  
43  
44  
45  
46  
47  
48  
49  
50  
51  
52  
53  
54  
55  
56  
57  
58  
59  
60
37. Guba EG, Lincoln YS. Competing paradigms in qualitative research. In: Denzin NK, Lincoln YS, editors. Handbook of qualitative research. Thousand Oaks, CA: Sage; 1994. p. 105-17.
38. Yen PY, Phillips A, Kennedy MK, Collins S. Nursing informatics competency assessment for the nurse leader: Instrument refinement, validation and psychometric analysis. Nurs Adm. 2017;47(5):271-7.

1  
2  
3  
4  
5  
6  
7  
8  
9  
10  
11  
12  
13  
14  
15  
16  
17  
18  
19  
20  
21  
22  
23  
24  
25  
26  
27  
28  
29  
30  
31  
32  
33  
34  
35  
36  
37  
38  
39  
40  
41  
42  
43  
44  
45  
46  
47  
48  
49  
50  
51  
52  
53  
54  
55  
56  
57  
58  
59  
60

For peer review only



# BMJ Open

## Exploring the role of the nurse manager in supporting point of care nurses' adoption of electronic health records: Protocol for a qualitative research study

|                                 |                                                                                                                                                                                                   |
|---------------------------------|---------------------------------------------------------------------------------------------------------------------------------------------------------------------------------------------------|
| Journal:                        | <i>BMJ Open</i>                                                                                                                                                                                   |
| Manuscript ID                   | bmjopen-2017-018129.R1                                                                                                                                                                            |
| Article Type:                   | Protocol                                                                                                                                                                                          |
| Date Submitted by the Author:   | 21-Jul-2017                                                                                                                                                                                       |
| Complete List of Authors:       | Strudwick, Gillian; Centre for Addiction and Mental Health, Information Management Group<br>Booth, Richard ; Western University<br>Bjarnadottir, Ragnhildur<br>Collins, Sarah<br>Srivastava, Rani |
| <b>Primary Subject Heading</b>: | Health informatics                                                                                                                                                                                |
| Secondary Subject Heading:      | Nursing, Mental health, Health services research, Qualitative research                                                                                                                            |
| Keywords:                       | MENTAL HEALTH, Health informatics < BIOTECHNOLOGY & BIOINFORMATICS, HEALTH SERVICES ADMINISTRATION & MANAGEMENT, QUALITATIVE RESEARCH                                                             |
|                                 |                                                                                                                                                                                                   |

SCHOLARONE™  
Manuscripts

**BMJ Open Protocol****Title:**

Exploring the role of the nurse manager in supporting point of care nurses' adoption of electronic health records: Protocol for a qualitative research study

**Authors:**

Gillian Strudwick RN, PhD

Project Scientist, Information Management Group, Centre for Addiction and Mental Health,  
Toronto, Canada

Richard G. Booth RN, PhD

Assistant Professor, Arthur Labatt School of Nursing, Western University, London, Canada

Ragnhildur I. Bjarnadottir RN, MPH, PhD

Postdoctoral Associate, College of Nursing, University of Florida, Gainesville, USA

Sarah Collins RN, PhD

Senior Clinical and Nurse Informatician, Partners eCare and Instructor in Medicine, Harvard  
Medical School & Brigham and Women's Hospital, Boston, USA

Rani Srivastava RN, PhD

Chief of Nursing and Professional Practice, Centre for Addiction and Mental Health, Toronto,  
Canada

**Corresponding Author:**

Gillian Strudwick RN, PhD

Information Management Group, Centre for Addiction and Mental Health, Toronto, Canada  
Room 4265, 101 Stokes Street, Toronto, Ontario  
Gillian.strudwick@camh.ca  
416-535-8501 ext 39333

**Abstract:**

**Introduction:** An increasing number of electronic health record systems have been implemented in clinical practice environments where nurses work. Findings from previous studies have found that a number of intended benefits of the technology have not yet been realized to date, partially due to poor system adoption amongst health professionals such as nurses. Previous studies have suggested that nurse managers can support the effective adoption and use of the technology by nurses. However, no known studies have identified what role nurse managers have in supporting technology adoption, nor the specific strategies that managers can employ to support their staff. Therefore, the purpose of this research is to better understand the role of the nurse manager in point of care nurses' use of electronic health records, and to identify strategies that may be effective in supporting clinical adoption.

**Methods and Analysis:** This study will use a qualitative descriptive design. Interviews with both nurse managers and point of care nursing staff will be conducted in a Canadian mental health and addiction healthcare organization where an electronic health record has been implemented. A semi-structured interview guide will be used, and interviews will be audio recorded. Transcripts will be analyzed using a directed content analysis technique. Strategies to ensure the trustworthiness of the data analysis procedure and findings will be employed.

**Ethics and Dissemination:** Ethical approval for this study has been obtained. Dissemination strategies may include a paper submission to a peer-reviewed journal, a conference submission, and meetings to share findings with the study site leadership team. Findings from this research will be used to inform a future study which aims to assess levels of competencies and perform a psychometric analysis of the Nursing Informatics Competency Assessment for the Nurse Leader instrument in a Canadian context.

**Strengths and limitations of this study:**

- This is the first known study aimed at understanding the role of nurse managers, and identifying strategies that they can use to support point of care nurses' use of electronic health records
- Insights gained from this study can be used to inform future research that aims to examine the efficacy of specific strategies employed by nurse managers to support electronic health record adoption
- This study will be done at a single study site using a qualitative approach, and therefore the findings may not be generalizable

## INTRODUCTION

Electronic health records (EHRs) are repositories of patient information accessible by health professionals through information and communication technologies, and used for a number of health related functions.<sup>1</sup> These functions may include electronic documentation, clinical decision making support, electronic medication administration and computerized provider order entry. In the last decade, EHRs have been increasingly implemented in numerous healthcare environments.<sup>2-4</sup> Evaluation studies have been conducted to determine the benefits of EHRs and related technologies to patients, health professionals, and organizations.<sup>5-11</sup> Findings of this work suggest that simply installing and implementing an EHR in a clinical environment does not guarantee its success in generating intended benefits. A study by Simon et al. reported that for an EHR to be most effective, health professionals should use the technology in a consistent, appropriate, and uniform way.<sup>12</sup> As nurses make up the largest health professional group in many countries such as the United States<sup>13</sup> and Canada,<sup>14</sup> they may be the largest group of users of EHRs.<sup>15</sup> Therefore, understanding how to achieve consistent, appropriate, and uniform use of the technology by nurses is of importance.

### **Electronic Health Records within Mental Health and Addiction Settings**

While EHR implementations have continually grown in recent years, mental health and addiction settings lag behind other settings in adoption rates.<sup>16-18</sup> The causes of this disparity are not well understood. However, it may be partially explained by the unique needs and challenges of this population.<sup>17,18</sup> In contrast to acute care medical settings, mental health and addiction settings frequently structure their care based on a collaborative treatment and recovery model of care. This means that goals of treatment and needs for quality care monitoring may differ from other settings.<sup>18,19</sup> Consequently, customization may be required for EHRs to support care in this

1  
2  
3 setting. Additionally, concerns of stigma and patient confidentiality are substantial in this setting  
4 and may be perceived as a further barrier to EHR implementation.<sup>17</sup> When EHRs are successfully  
5 implemented in mental health and addiction settings, they have been demonstrated to improve  
6 care coordination, facilitate quality assurance and improvement, support patient-centered  
7 practice, and improve addiction treatment delivery.<sup>17,18,20</sup> Therefore, it is of particular importance  
8 to examine how to achieve adequate use of EHR technology by nurses in this unique and  
9 understudied setting.

### 10 11 12 13 14 15 16 17 18 19 20 **Nurse' Adoption of Electronic Health Records:**

21  
22 In the last decade, numerous studies have examined the factors that influence nurses'  
23 adoption of EHRs. Findings of these studies have suggested that factors related to the EHR  
24 usability,<sup>21-24</sup> the organizational context,<sup>25-27</sup> and individual nurse characteristics,<sup>28</sup> may influence  
25 nurse' use of the technology. Specifically, several authors have discussed the importance of the  
26 nurse manager (nursing managers who are also nurses themselves) in supporting nurses' use of  
27 EHRs.<sup>11,29-31</sup> Nurse managers were described in these studies as being those that had point of  
28 care nurses who directly reported to them. In Whittaker et al.'s study of barriers and facilitators  
29 to nurses' use of an EHR, nurses reported that having a supportive manager was believed to  
30 facilitate their use of the system.<sup>30</sup> Yang and colleagues report that nurse managers are well  
31 positioned to provide leadership and support to point of care nurses in their use of EHRs.<sup>31</sup> Each  
32 author has identified that nurse managers play a critical role in the successful adoption and use of  
33 the technology for point of care nurses. However, none of the authors identified what role nurse  
34 manager's play in providing support, and the related effectiveness of implemented strategies.  
35  
36  
37  
38  
39  
40  
41  
42  
43  
44  
45  
46  
47  
48  
49  
50  
51  
52  
53 Therefore, this research will seek to identify the role of nurse managers in providing support, in  
54  
55  
56  
57  
58  
59  
60

1  
2  
3 order to enhance point of care nurses' adoption of EHRs in organizations that currently have  
4  
5 EHRs implemented.  
6  
7

8 This study is important as no known studies have explored this topic in the past, and there  
9  
10 is expected to be an increasing number of EHRs implemented in organizations where nurses  
11  
12 work in the coming decade. Research that aims to identify the role of nurse managers in  
13  
14 providing EHR support, and what type of support is effective, may allow for interventions to be  
15  
16 developed and researched that enhance point of care nurses' adoption of EHRs. It is possible that  
17  
18 benefits of the technology may be realized when nurses are adequately supported, and are able to  
19  
20 effectively use the systems in their work.  
21  
22  
23

## 24 **METHODS AND ANALYSIS**

### 25 **Research Questions:**

26  
27 Given that there has been little research to date examining the role that nurse managers  
28  
29 play in supporting point of care nurses' adoption and use of EHRs, the authors aim to address the  
30  
31 following research questions:  
32  
33  
34

- 35  
36 1) What role do nurse managers play in supporting point of care nurses' adoption of  
37  
38 EHRs?  
39  
40 2) What strategies have nurse managers used to support point of care nurses use of EHRs,  
41  
42 and how do point of care nurses perceive these strategies?  
43  
44  
45

### 46 **Theoretical Framework:**

47  
48 This study will draw upon the Staggers and Parks Nurse-Computer Interaction  
49  
50 Framework (SPNCIF).<sup>32</sup> The SPNCIF was developed by nursing informatics researchers in the  
51  
52 United States, and has been used in the study of nurses' adoption of EHRs to identify relevant  
53  
54 contextual, system/usability and individual nurse characteristics that may influence nurses'  
55  
56  
57  
58  
59  
60

1  
2  
3 adoption of the technology.<sup>30,32,33</sup> Given that SPNFIC has been found to be useful in identifying  
4  
5 barriers and facilitators of EHR adoption in previous research,<sup>30</sup> the framework will provide a  
6  
7 structure by which strategies identified by nurse managers and point of care nursing staff to  
8  
9 support nurse use of these systems can be understood. In this study, the SPNCIF will be used to  
10  
11 guide both data collection and analysis, given that supports provided by nurse managers may be  
12  
13 attributed to the three domains of the framework (contextual, system/usability, individual nurse  
14  
15 characteristics).  
16  
17  
18

### 19 20 **Design:**

21  
22 This study will employ a qualitative descriptive approach<sup>34</sup> consisting of semi-structured  
23  
24 individual interviews with both nurse managers and point of care nursing staff.  
25  
26

### 27 28 **Sample:**

29  
30 The sample of participants in this study will consist of both nurse managers and point of  
31  
32 care nursing staff. Nurse managers are considered those who directly supervise and oversee point  
33  
34 of care nursing staff in a particular care setting. These managers may be responsible for both  
35  
36 administrative and clinical tasks such as hiring, managing, scheduling and disciplining nursing  
37  
38 staff, promoting the use of best practice, and managing patient and family feedback. There are a  
39  
40 number of job titles that nurse managers may have, including: 'nursing unit administrator',  
41  
42 'nurse manager', 'unit manager', 'nursing director' and others. Managers who are female or male  
43  
44 will be included in this study.  
45  
46  
47

48  
49 Point of care nursing staff are defined in this study as those who provide direct care to  
50  
51 patients as either registered nurses or registered/licensed practical nurses. Nurses working in  
52  
53 advanced practice roles, such as nurse practitioners and clinical nurse specialists will be excluded  
54  
55 from this study given their differing work patterns, and use of the EHR. Participants (nurse  
56  
57  
58  
59  
60



1  
2  
3 managers and point of care nursing staff) who have been in their roles for a minimum of one year  
4  
5 will be eligible to participate in the study. This criterion was set to ensure that only those  
6  
7 participants who are familiar with their own roles as either a nurse manager or point of care  
8  
9 nursing staff are included in this study. In this study a diverse group of point of care nurses will  
10  
11 be recruited with varying levels of experience both in their role as a nurse, the length of time  
12  
13 they have used an EHR, and their mental health nursing experience. Both male and female point  
14  
15 of care nurses will be included in this study.  
16  
17  
18  
19

20 Typical case sampling, a sub-set of purposive sampling, will be used to ensure that  
21  
22 participants are typical of the age range, education, and work experience of nurse managers and  
23  
24 point of care staff employed at the organization.<sup>35</sup> This will also be done to ensure that a range of  
25  
26 participant responses are captured during the interviews that represent those of the average nurse  
27  
28 manager or point of care nurse. Information on nurse manager and point of care nurse age,  
29  
30 education and work experience will be obtained through internal organizational documents and  
31  
32 resources. This information will be used to select an appropriate sample of participants.  
33  
34  
35

36 Interviews with participants will be conducted until data saturation has been obtained. In  
37  
38 a previous study aimed at identifying the barriers and facilitators to point of care nurses' use of  
39  
40 an EHR, data saturation was achieved after eleven point of care nurses had been interviewed.<sup>30</sup> It  
41  
42 is therefore expected that between ten and twelve interviews will be conducted for each group  
43  
44 (nurse managers and point of care staff) totaling twenty to twenty-four interviews. However, it is  
45  
46 possible that a lesser or greater number of participants is required to reach data saturation in this  
47  
48 study.  
49  
50  
51

### 52 **Setting:**

53  
54  
55  
56  
57  
58  
59  
60

1  
2  
3 This study will be conducted at a large mental health organization in an urban setting in  
4 Ontario, Canada. This organization has implemented a comprehensive EHR with several  
5 common functionalities including computerized provider order entry, electronic medication  
6 administration, barcode medication administration, clinical documentation, and laboratory and  
7 results reporting and viewing. The EHR has been implemented throughout the organization, and  
8 nurses (and other clinical staff) are required to use the system to obtain information, make  
9 decisions and document assessments and care provided. Point of care nursing staff receive two  
10 days of training on the EHR, while nurse managers receive varying amounts of training ranging  
11 from none to two days. The particular EHR in place was developed by an external vendor, and is  
12 present in a number of healthcare organizations both locally and internationally. Customizations  
13 for particular fields and forms have been made to the EHR at the study site, however the design  
14 and functionality remain similar to those implemented at other organizations with the same  
15 vendor.  
16  
17  
18  
19  
20  
21  
22  
23  
24  
25  
26  
27  
28  
29  
30  
31  
32  
33

### 34 **Recruitment and Data Collection:**

35  
36 Participants in this study will be recruited via an email invitation to their work email  
37 account that informs potential participants of the study purpose, details of participating, and  
38 voluntary nature of the study. The invitation will be sent from one of the researchers' email  
39 accounts and not by any person that a point of care nurse or manager may report to. Emails of  
40 potential participants are available to researchers through internal organizational documents.  
41  
42 Upon receiving the email invitation, if a potential participant is in agreement, the researcher will  
43 coordinate a date, time and place for the interview to take place. The research team will send a  
44 copy of the informed consent letter via email for the potential participant to read ahead of time.  
45  
46  
47  
48  
49  
50  
51  
52  
53  
54  
55  
56  
57  
58  
59  
60

1  
2  
3 will inform the potential participant again about the purpose of the study, details of participating,  
4 and the voluntary nature of the study. There will be time for the potential participant to ask  
5  
6 questions of the researcher during this time. Lastly, the informed consent letter will be signed  
7  
8  
9 before the interview begins.  
10  
11

12  
13 Semi-structured interview guides specific to each group of participants (nurse manager or  
14 point of care nursing staff), have been developed (see Table 1 and 2). The interview guides were  
15 developed so that participant responses could be mapped to the SPNCIF. The questions were  
16  
17 purposefully broad so that the questions were not leading, and so that participant responses could  
18  
19 be mapped to the framework domains. Whittaker and colleagues<sup>30</sup> used the same approach when  
20  
21 completing a similar study of point of care medical-surgical nurses using the SPNCIF.  
22  
23  
24  
25  
26

27 The specific researchers who will be involved in various elements of the study, their  
28  
29 credentials, their occupation at the time of the study, their gender and both their experience and  
30  
31 training, will be detailed in any dissemination materials.  
32  
33  
34  
35  
36  
37  
38  
39  
40  
41  
42  
43  
44  
45  
46  
47  
48  
49  
50  
51  
52  
53  
54  
55  
56  
57  
58  
59  
60

Table 1

## Semi-Structured Interview Guide for Managers

|                                                                                                                                                                                                                                                                                                                                                                                                                                                                                                                                                                                                                                         |                                                                                                                                                                                                                                                                                              |
|-----------------------------------------------------------------------------------------------------------------------------------------------------------------------------------------------------------------------------------------------------------------------------------------------------------------------------------------------------------------------------------------------------------------------------------------------------------------------------------------------------------------------------------------------------------------------------------------------------------------------------------------|----------------------------------------------------------------------------------------------------------------------------------------------------------------------------------------------------------------------------------------------------------------------------------------------|
| <p>Welcome and thank you for agreeing to participate in this study.</p> <p>The purpose of the study is to examine the role that nurse managers play in supporting point of care nurses' use and adoption of electronic health records such as [name of EHR].</p> <p>During this interview, you will be asked to share your perspective as a manager. Please do not discuss anything that was said today outside of this interview. As well, this interview will be audio recorded, however no identifying information such as your name, will be transcribed from the recordings.</p> <p>Do you have any questions before we begin?</p> |                                                                                                                                                                                                                                                                                              |
| Question 1                                                                                                                                                                                                                                                                                                                                                                                                                                                                                                                                                                                                                              | What do you believe your role is in providing support to point of care nurses in their use of [name of EHR]?                                                                                                                                                                                 |
| Question 2                                                                                                                                                                                                                                                                                                                                                                                                                                                                                                                                                                                                                              | What strategies have you used to support point of care nurses' use of [name of EHR]?                                                                                                                                                                                                         |
| Question 3                                                                                                                                                                                                                                                                                                                                                                                                                                                                                                                                                                                                                              | Can you describe for me which strategies that you have used that <u>have been</u> particularly effective in supporting nurses' use of [name of EHR]?                                                                                                                                         |
| Question 4                                                                                                                                                                                                                                                                                                                                                                                                                                                                                                                                                                                                                              | Can you describe for me which strategies that you have used that have <u>not been</u> effective in supporting nurses' use of [name of EHR]?                                                                                                                                                  |
| Question 5                                                                                                                                                                                                                                                                                                                                                                                                                                                                                                                                                                                                                              | <p>Are there other strategies that you would like to do to support point of care nurses' use of [name of EHR]?</p> <p><u>Follow-up:</u> How come? How come you have not been able to implement this strategy thus far? What might it take for you to be able to implement this strategy?</p> |
| Question 6                                                                                                                                                                                                                                                                                                                                                                                                                                                                                                                                                                                                                              | Is there anything else you would like to share with me about your support of point of care nurses' use of [name of EHR]?                                                                                                                                                                     |
| <p>Thank you for participating in this interview. Everything that was said today will remain confidential.</p>                                                                                                                                                                                                                                                                                                                                                                                                                                                                                                                          |                                                                                                                                                                                                                                                                                              |

Table 2

## Semi-Structured Interview Guide for Point of care Nurses

|                                                                                                                                                                                                                                                                                                                                                                                                                                                                                                                                                                                                                                                     |                                                                                                                                                              |
|-----------------------------------------------------------------------------------------------------------------------------------------------------------------------------------------------------------------------------------------------------------------------------------------------------------------------------------------------------------------------------------------------------------------------------------------------------------------------------------------------------------------------------------------------------------------------------------------------------------------------------------------------------|--------------------------------------------------------------------------------------------------------------------------------------------------------------|
| <p>Welcome and thank you for agreeing to participate in this study.</p> <p>The purpose of the study is to examine the role that nurse managers play in supporting point of care nurses' use and adoption of electronic health records such as [name of EHR].</p> <p>During this interview, you will be asked to share your perspective as a point of care nurse. Please do not discuss anything that was said today outside of this interview. As well, this interview will be audio recorded, however no identifying information such as your name, will be transcribed from the recordings.</p> <p>Do you have any questions before we begin?</p> |                                                                                                                                                              |
| Question 1                                                                                                                                                                                                                                                                                                                                                                                                                                                                                                                                                                                                                                          | What do you believe your managers' role is in providing support to point of care nurses in their use of [name of EHR]?                                       |
| Question 2                                                                                                                                                                                                                                                                                                                                                                                                                                                                                                                                                                                                                                          | What strategies has your manager used to support point of care nurses' use of [name of EHR]?                                                                 |
| Question 3                                                                                                                                                                                                                                                                                                                                                                                                                                                                                                                                                                                                                                          | Can you describe for me which strategies that your manager has used that <u>have been</u> particularly effective in supporting nurses' use of [name of EHR]? |
| Question 4                                                                                                                                                                                                                                                                                                                                                                                                                                                                                                                                                                                                                                          | Can you describe for me which strategies your manager has used that have <u>not been</u> effective in supporting nurses' use of [name of EHR]?               |
| Question 5                                                                                                                                                                                                                                                                                                                                                                                                                                                                                                                                                                                                                                          | Are there other strategies that you would like to see your manager use to support your use of [name of EHR]?                                                 |
| Question 6                                                                                                                                                                                                                                                                                                                                                                                                                                                                                                                                                                                                                                          | Is there anything else you would like to share with me about your managers support of point of care nurses' use of [name of EHR]?                            |
| <p>Thank you for participating in this interview. Everything that was said today will remain confidential.</p>                                                                                                                                                                                                                                                                                                                                                                                                                                                                                                                                      |                                                                                                                                                              |

1  
2  
3  
4  
5  
6  
7  
8  
9  
10  
11  
12  
13  
14  
15  
16  
17  
18  
19  
20  
21  
22  
23  
24  
25  
26  
27  
28  
29  
30  
31  
32  
33  
34  
35  
36  
37  
38  
39  
40  
41  
42  
43  
44  
45  
46  
47  
48  
49  
50  
51  
52

These interview guides were developed based on relevant literature, the theoretical framework, and the research questions in this study. Each interview guide consists of six open-ended questions. Participants will also be asked to provide the type of nursing registration they hold (registered nurse or registered/licensed practical nurse), years of experience using the EHR, and years of experience working as a mental health nurse. It is expected that interviews will take approximately between 20 and 45 minutes depending on the amount of detail provided by the participant. By using a semi-structured interview approach, all participants will be guided through the same sets of questions, however the interviewer will have the opportunity to probe further when required to gain a deeper understanding of the participant's perspectives. No incentives will be provided to participants.

Interviews will be conducted in quiet meeting rooms throughout the organization where this study will take place. Although it is unlikely that someone would know that a participant is going into a meeting room to participate in this study, these rooms will purposefully be booked in areas of the organization where the participant is not routinely working e.g. not on the clinical unit where the participant is working or responsible for.

Interviews will be audio recorded and transcribed verbatim via an external transcription service with appropriate data security measures in place. No names will be transcribed; instead pseudonyms will be used. Once the study has been completed, the original audio recording will be deleted. The audio recorder will be kept in a locked filing cabinet in a locked room. The transcriptions will be kept in an internal electronic secure folder only accessible by the principal investigator.

### 53 **Analysis:**

54  
55  
56  
57  
58  
59  
60

1  
2  
3 Interview data transcriptions will be entered into NVivo qualitative data analysis software  
4 (QSR International Pty Ltd. Version 11, 2014). Data analysis will be completed via a directed  
5 content analysis<sup>36</sup> based on the domains from the Stagers and Parks Nurse-Computer  
6 Interaction Framework. This is an appropriate technique given that the framework was used to  
7 guide the study methodology, and semi-structured interview guide. Pre-determined codes will be  
8 developed based on these domains. Two members of the research team will first independently  
9 apply these codes to the interview data. These team members will then meet to compare and  
10 contrast their findings. Where disagreements in the applied coding are discovered, the two  
11 research team members will discuss the emergent coding and come to a consensus regarding its  
12 interpretation. If consensus cannot be achieved by the two research team members, the entire  
13 research team will be involved in analyzing the data and coming to agreement regarding the  
14 proper code to associate to a particular set of data.  
15  
16  
17  
18  
19  
20  
21  
22  
23  
24  
25  
26  
27  
28  
29  
30  
31

32 Data that cannot be attributed to a pre-determined code will be subject to open coding  
33 through an inductive analysis process. During this time, new codes may be generated to represent  
34 findings that did not apply to the pre-determined codes. Any disagreements regarding the need to  
35 use open coding will be attempted to be resolved through discussion between the two researchers  
36 involved in the coding. However, in cases when agreement cannot be reached, another member  
37 of the research team will be consulted.  
38  
39  
40  
41  
42  
43  
44  
45  
46

#### 47 **Trustworthiness:**

48 The authors will take several measures to conduct a credible and trustworthy study.<sup>37</sup>  
49 First, experts in both the subject area and qualitative research methods have assisted in the  
50 conceptualization and development of the study protocol. Second, direct quotes arising from  
51 participants will be used to demonstrate alignment to the Stagers and Parks Nurse-Computer  
52  
53  
54  
55  
56  
57  
58  
59  
60

1  
2  
3 Interaction Framework domains, and serve as a method to increase credibility of analysis. To  
4  
5 improve the dependability and trustworthiness of the analysis process, two members of the  
6  
7 research team will remain embedded in the data and independently code the raw data to the  
8  
9 framework. Member-checking with two nurse managers and two point of care staff members  
10  
11 who participated in the study will also be completed to ensure credibility and meaning were  
12  
13 captured appropriately within the preliminary analysis.  
14  
15

### 16 17 18 **ETHICAL CONSIDERATIONS**

19  
20 This study is considered to be of low risk, and the participants are not considered  
21  
22 vulnerable. Ethical approval (2016-17.117) has been obtained from the organization in which  
23  
24 this study will take place.  
25  
26

### 27 28 **DISCUSSION AND DISSEMINATION**

29  
30 The proposed study is significant for several reasons: 1) it examines the role of nurse  
31  
32 managers in supporting point of care nurses' use of EHRs, which is currently unclear in the  
33  
34 literature and in practice environments, and 2) it is the first study to allow for the identification of  
35  
36 strategies that nurse managers can implement to support effective EHR implementation and  
37  
38 adoption by point of care nurses. Results of this study will be of value to nurse managers and  
39  
40 hospital leaders who have, or plan to implement an EHR in their clinical environment. Therefore  
41  
42 the authors plan to pursue dissemination strategies that are targeted at nurse managers and  
43  
44 hospital leaders through an academic peer-reviewed journal article submission. A journal that  
45  
46 focuses on the topic of nursing management, administration or leadership will be selected. In  
47  
48 addition to a journal article, the authors plan to submit an abstract for a presentation at the  
49  
50 Nursing Leadership Network of Ontario annual conference. This conference is an appropriate  
51  
52  
53  
54  
55  
56  
57  
58  
59  
60



1  
2  
3 forum as the attendees are made up of nurse managers, administrators and leaders. In addition,  
4  
5 the findings from this research will be shared with the senior leadership team at the study site.  
6  
7

8 The results of this research will be used to develop a future study which aims to: 1) assess  
9  
10 levels of informatics competencies of nurse leaders, and 2) perform a psychometric analysis of  
11  
12 the Nursing Informatics Competency Assessment for the Nurse Leader (NICA-NL) instrument in  
13  
14 a Canadian context. The NICA-NL is a self-assessment instrument that can be used by nurse  
15  
16 leaders (inclusive of nurse managers) to evaluate their level of nursing informatics  
17  
18 competencies.<sup>38</sup> Information obtained from this future study in combination with findings from  
19  
20 the present study, can be used to identify areas where Canadian resources may be created to  
21  
22 support the development of specific informatics competencies for nurse leaders, inclusive of  
23  
24 nurse managers.  
25  
26  
27  
28

### 29 **Conclusion:**

30  
31 This research will make an important contribution to the nursing informatics literature in  
32  
33 that it will be the first study aimed at better understanding the role of the nurse manager in point  
34  
35 of care nurses' adoption of EHRs, and what strategies are effective. End-of-study dissemination  
36  
37 strategies of the research results have therefore been planned to inform relevant stakeholder  
38  
39 groups of the study findings. In addition, the results will be used to develop a future research  
40  
41 study which aims to assess levels of competencies and perform a psychometric analysis of  
42  
43 NICA-NL in a Canadian context.  
44  
45  
46  
47  
48  
49  
50  
51  
52  
53  
54  
55  
56  
57  
58  
59  
60

1  
2  
3  
4  
5  
6 **Authors Contributions:** GS, RGB and RIB conceptualized the study. Modifications to the study  
7  
8 were made based on the feedback obtained from SC and RS. GS drafted the manuscript and all  
9  
10 authors made contributions to its development. All authors reviewed and approved the final  
11  
12 manuscript.  
13

14  
15  
16  
17 **Funding statement:** Funding for this work was obtained from the Nursing Leadership Network  
18  
19 of Ontario, and the Nursing Research Interest Group of the Registered Nurses' Association of  
20  
21 Ontario.  
22  
23

24  
25  
26  
27 **Competing interests statement:** The authors declare that they have no conflict of interest.  
28  
29

30  
31  
32 **Acknowledgements:** The authors want to thank Iman Kassam for her help in formatting this  
33  
34 manuscript.  
35  
36  
37  
38  
39  
40  
41  
42  
43  
44  
45  
46  
47  
48  
49  
50  
51  
52  
53  
54  
55  
56  
57  
58  
59  
60

## References

1. Hayrinen K, Saranto K, Nykanen P. Definition, structure, content, use and impacts of electronic health records: A review of the research literature. *Int J Med Inf.* 2008;77 (5): 291-304.
2. Canada Health Infoway [Internet]. Progress in Canada; c2017 [cited 2017]. Available from <https://www.infoway-inforoute.ca/en/what-we-do/progress-in-canada>
3. Charles D, Gabriel M, Searcy T. Adoption of electronic health record systems among U.S. non-federal acute care hospitals: 2008-2014. Office of the National Coordinator for Health Information Technology. 2015;23:1-10.
4. The Commonwealth Fund [Internet]. What is the status of electronic health records; c2017 [cited 2017]. Available from <http://international.commonwealthfund.org/features/ehrs/>
5. Bjarnadottir RI, Herzig CT, Travers JL, Castle NG, Stone PW. Implementation of electronic health records in U.S. nursing homes. *Comput Inform Nurs.* 2017. Epub 2017.
6. Bowman S. Impact of electronic health record systems on information integrity: Quality and safety implications. *Perspect Health Inf Manag.* 2013 Fall;10:1c.
7. Chaudhry B, Wang J, Wu S, Magilone M, Mojica W, Roth E, Morton SC, Shekelle PG. Systematic review: Impact of health information technology on quality, efficiency, and costs of medical care. *Ann of Intern Med.* 2006;144(10):742-52.
8. Campanella P, Lovato E, Marone C, Fallacara L, Mancuso A, Ricciardi W, Specchia ML. The impact of electronic health records on healthcare quality: A systematic review and meta-analysis. *Eur J Public Health.* 2015;26(1):60-4.

- 1  
2  
3 9. Koppel R, Wetterneck TB, Telles JL, Karsh B. Workarounds to barcode medication  
4  
5 administration systems: their occurrences, causes, and threats to patient safety. *J Am Med*  
6  
7 *Inform Assoc.* 2008;15:408-23.  
8  
9
- 10 10. Patterson ES, Rogers ML, Chapman RJ, Render MI. Compliance with intended use of bar  
11  
12 code medication administration in acute and long-term care: an observational study. *Hum*  
13  
14 *Factors.* 2006;48:15-22.  
15  
16
- 17 11. Poissant L, Pereira J, Tmablyn R, Kawasumi Y. The impact of electronic health records on  
18  
19 time efficiency of physicians and nurses: a systematic review. *J Am Med Inform Assoc.*  
20  
21 2005;12(5):505-16.  
22  
23
- 24 12. Simon SR, Kaushal R, Cleary PD, Jenter CA, Volk LA, Orav EJ, et al. Physicians and  
25  
26 electronic health records: A statewide survey. *Arch of Intern Med.* 2007;167(5):507-12.  
27  
28
- 29 13. American Association of Colleges of Nursing [Internet]. Nursing Fact Sheet; c2011 [cited  
30  
31 2017]. Available from [http://www.aacn.nche.edu/media-relations/fact-sheets/nursing-](http://www.aacn.nche.edu/media-relations/fact-sheets/nursing-fact-sheet)  
32  
33 [fact-sheet](http://www.aacn.nche.edu/media-relations/fact-sheets/nursing-fact-sheet).  
34  
35
- 36 14. Canadian Nurses Association [Internet]. Framework for the Practice of Registered Nurses in  
37  
38 Canada; c2015 [cited 2017]. Available from [https://www.cna-aiic.ca/~media/cna/page-](https://www.cna-aiic.ca/~media/cna/page-content/pdf-en/framework-for-the-practice-of-registered-nurses-in-canada.pdf?la=en)  
39  
40 [content/pdf-en/framework-for-the-practice-of-registered-nurses-in-canada.pdf?la=en](https://www.cna-aiic.ca/~media/cna/page-content/pdf-en/framework-for-the-practice-of-registered-nurses-in-canada.pdf?la=en).  
41  
42
- 43 15. Kutney-Lee A, Kelly D. The effect of hospital electronic health record adoption on nurse-  
44  
45 assessed quality of care and patient safety. *J Nurs Adm.* 2011;41(11):466-72.  
46  
47
- 48 16. The Office of the National Coordinator for Health Information Technology [Internet]. Data  
49  
50 Brief; c2017[cited 2017]. Available from [/evaluations/data-briefs/non-federal-acute-care-](/evaluations/data-briefs/non-federal-acute-care-hospital-ehr-adoption-2008-2015.php)  
51  
52 [hospital-ehr-adoption-2008-2015.php](/evaluations/data-briefs/non-federal-acute-care-hospital-ehr-adoption-2008-2015.php)  
53  
54  
55  
56  
57  
58  
59  
60

- 1  
2  
3  
4  
5  
6  
7  
8  
9  
10  
11  
12  
13  
14  
15  
16  
17  
18  
19  
20  
21  
22  
23  
24  
25  
26  
27  
28  
29  
30  
31  
32  
33  
34  
35  
36  
37  
38  
39  
40  
41  
42  
43  
44  
45  
46  
47  
48  
49  
50  
51  
52  
53  
54  
55  
56  
57  
58  
59  
60
17. McGregor B, Mack D, Wrenn G, Shim RS, Holden K, Satcher D. Improving service coordination and reducing mental health disparities through adoption of electronic health records. *Psychiatr Serv*. 2016;66(9): 985-7.
18. Riahi S, Fischler I, Stuckey MI, Klassen PE, Chen J. The value of electronic medical record implementation in mental health care: A case study. *JMIR Med Inform*. 2017;5(1).
19. Oades LG, Deane F, Crowe T, Lambert WG, Kavanagh D, Lloyd C. Collaborative recovery: an integrative model for working with individuals who experience chronic and recurring mental illness. *Australas Psychiatry*. 2005;13(3):279-84.
20. Ghitza UE, Sparenborg S, Tai B. Improving drug abuse treatment delivery through adoption of harmonized electronic health record systems. *Subst Abuse and Rehabil*. 2011;2:125-31.
21. Ammenwerth E, Ehlers F, Hirsch B, Gratl G. HIS-Monitor: An approach to assess the quality of information processing in hospitals. *Int J Med Inf*. 2006;76:216-25.
22. Carayon P, Cartmill R, Blosky M, Brown R, Hackenberg M, Hoonakker P, et al. ICU nurses' acceptance of electronic health records. *J Am Med Inform Assoc*. 2011;18:812-9.
- 23.. Carrington JM, Effken JA. Strengths and limitations of the electronic health record for documenting clinical events. *Comput Inform Nurs*. 2011;29(6):360-7.
24. Schenk EC, Mayer DM, Ward-Barney E, Estill P, Goss L, Shreffler-Grant J. RN perceptions of a newly adopted electronic health record. *J Nurs Adm*. 2016;46(3):139-45.
25. Lu CH, Hsiao JL, Chen RF. Factors determining nurse acceptance of hospital information systems. *Comput Inform Nurs*. 2012;30(5)-257-64.
26. Maillet E, Mathieu L, Sicotte C. Modeling factors explaining the acceptance, actual use and satisfaction of nurses using an electronic patient record in acute care settings: An extension of the UTAUT. *Int J Med Inf*. 2015;84:36-47.

- 1  
2  
3  
4  
5  
6  
7  
8  
9  
10  
11  
12  
13  
14  
15  
16  
17  
18  
19  
20  
21  
22  
23  
24  
25  
26  
27  
28  
29  
30  
31  
32  
33  
34  
35  
36  
37  
38  
39  
40  
41  
42  
43  
44  
45  
46  
47  
48  
49  
50  
51  
52  
53  
54  
55  
56  
57  
58  
59  
60
27. Saleem JJ, Plew WR, Speir RC, Herout J, Wilck NR, Ryan DM, et al. Understanding barriers and facilitators to the use of clinical information systems for intensive care units and anesthesia record keeping: A rapid ethnography. *Int J Med Inf.* 2015;84:500-11.
  28. Ifinedo P. The moderating effects of demographic and individual characteristics on nurses' acceptance of information systems: A canadian study. *Int J Med Inf.* 2016;87:27-35.
  29. Ash JS, Bates DW. Factors and forces affecting EHR system adoption: report of a 2004 ACMI discussion. *J Am Med Inform Assoc.* 2005;12:8-12.
  30. Whittaker AA, Aufdenkamp M, Tinley S. Barriers and facilitators to electronic documentation in a rural hospital. *J Nurs Scholarsh.* 2009;41(3):293-300.
  31. Yang L, Cui D, Zhu X, Zhao Q, Xiao N, Shen N. Perspectives from nurse managers on informatics competencies. *Scientific World Journal.* 2014.
  32. Staggers N, Parks N. Description and initial applications of the staggers and parks nurse-computer interaction framework. *Comput Inform Nurs.* 1993;11(6):282-90.
  33. Staggers N, Kobus D. Comparing response time, errors, and satisfaction between text-based and graphical user interfaces during nursing order tasks. *J Am Med Inform Assoc.* 2000;7(2):164-76.
  34. Sandelowski M. Whatever happened to qualitative description? *Res Nurs Health.* 2000;23(4):334-40.
  35. Palinkas L.A, Horwitz SM, Green CA, Wisdom JP, Duan N, Hoagwood K. Purposeful sampling for qualitative data collection and analysis in mixed method implementation research. *Adm Policy Ment Health.* 2015;42(5):533-44.
  36. Hsieh H, Shannon SE. Three approaches to qualitative content analysis. *Qual Health Res.* 2005;15(9):1277-88.

- 1  
2  
3  
4  
5  
6  
7  
8  
9  
10  
11  
12  
13  
14  
15  
16  
17  
18  
19  
20  
21  
22  
23  
24  
25  
26  
27  
28  
29  
30  
31  
32  
33  
34  
35  
36  
37  
38  
39  
40  
41  
42  
43  
44  
45  
46  
47  
48  
49  
50  
51  
52  
53  
54  
55  
56  
57  
58  
59  
60
37. Guba EG, Lincoln YS. Competing paradigms in qualitative research. In: Denzin NK, Lincoln YS, editors. Handbook of qualitative research. Thousand Oaks, CA: Sage; 1994. p. 105-17.
38. Yen PY, Phillips A, Kennedy MK, Collins S. Nursing informatics competency assessment for the nurse leader: Instrument refinement, validation and psychometric analysis. Nurs Adm. 2017;47(5):271-7.

## COREQ (CONsolidated criteria for REporting Qualitative research) Checklist

A checklist of items that should be included in reports of qualitative research. You must report the page number in your manuscript where you consider each of the items listed in this checklist. If you have not included this information, either revise your manuscript accordingly before submitting or note N/A.

| Topic                                          | Item No. | Guide Questions/Description                                                                                                                              | Reported on Page No. |
|------------------------------------------------|----------|----------------------------------------------------------------------------------------------------------------------------------------------------------|----------------------|
| <b>Domain 1: Research team and reflexivity</b> |          |                                                                                                                                                          |                      |
| <i>Personal characteristics</i>                |          |                                                                                                                                                          |                      |
| Interviewer/facilitator                        | 1        | Which author/s conducted the interview or focus group?                                                                                                   |                      |
| Credentials                                    | 2        | What were the researcher's credentials? E.g. PhD, MD                                                                                                     |                      |
| Occupation                                     | 3        | What was their occupation at the time of the study?                                                                                                      |                      |
| Gender                                         | 4        | Was the researcher male or female?                                                                                                                       |                      |
| Experience and training                        | 5        | What experience or training did the researcher have?                                                                                                     |                      |
| <i>Relationship with participants</i>          |          |                                                                                                                                                          |                      |
| Relationship established                       | 6        | Was a relationship established prior to study commencement?                                                                                              |                      |
| Participant knowledge of the interviewer       | 7        | What did the participants know about the researcher? e.g. personal goals, reasons for doing the research                                                 |                      |
| Interviewer characteristics                    | 8        | What characteristics were reported about the interviewer/facilitator? e.g. Bias, assumptions, reasons and interests in the research topic                |                      |
| <b>Domain 2: Study design</b>                  |          |                                                                                                                                                          |                      |
| <i>Theoretical framework</i>                   |          |                                                                                                                                                          |                      |
| Methodological orientation and Theory          | 9        | What methodological orientation was stated to underpin the study? e.g. grounded theory, discourse analysis, ethnography, phenomenology, content analysis |                      |
| <i>Participant selection</i>                   |          |                                                                                                                                                          |                      |
| Sampling                                       | 10       | How were participants selected? e.g. purposive, convenience, consecutive, snowball                                                                       |                      |
| Method of approach                             | 11       | How were participants approached? e.g. face-to-face, telephone, mail, email                                                                              |                      |
| Sample size                                    | 12       | How many participants were in the study?                                                                                                                 |                      |
| Non-participation                              | 13       | How many people refused to participate or dropped out? Reasons?                                                                                          |                      |
| <i>Setting</i>                                 |          |                                                                                                                                                          |                      |
| Setting of data collection                     | 14       | Where was the data collected? e.g. home, clinic, workplace                                                                                               |                      |
| Presence of non-participants                   | 15       | Was anyone else present besides the participants and researchers?                                                                                        |                      |
| Description of sample                          | 16       | What are the important characteristics of the sample? e.g. demographic data, date                                                                        |                      |
| <i>Data collection</i>                         |          |                                                                                                                                                          |                      |
| Interview guide                                | 17       | Were questions, prompts, guides provided by the authors? Was it pilot tested?                                                                            |                      |
| Repeat interviews                              | 18       | Were repeat interviews carried out? If yes, how many?                                                                                                    |                      |
| Audio/visual recording                         | 19       | Did the research use audio or visual recording to collect the data?                                                                                      |                      |
| Field notes                                    | 20       | Were field notes made during and/or after the interview or focus group?                                                                                  |                      |
| Duration                                       | 21       | What was the duration of the interviews or focus group?                                                                                                  |                      |
| Data saturation                                | 22       | Was data saturation discussed?                                                                                                                           |                      |
| Transcripts returned                           | 23       | Were transcripts returned to participants for comment and/or                                                                                             |                      |



| Topic                                  | Item No. | Guide Questions/Description                                                                                                        | Reported on Page No. |
|----------------------------------------|----------|------------------------------------------------------------------------------------------------------------------------------------|----------------------|
|                                        |          | correction?                                                                                                                        |                      |
| <b>Domain 3: analysis and findings</b> |          |                                                                                                                                    |                      |
| <i>Data analysis</i>                   |          |                                                                                                                                    |                      |
| Number of data coders                  | 24       | How many data coders coded the data?                                                                                               |                      |
| Description of the coding tree         | 25       | Did authors provide a description of the coding tree?                                                                              |                      |
| Derivation of themes                   | 26       | Were themes identified in advance or derived from the data?                                                                        |                      |
| Software                               | 27       | What software, if applicable, was used to manage the data?                                                                         |                      |
| Participant checking                   | 28       | Did participants provide feedback on the findings?                                                                                 |                      |
| <i>Reporting</i>                       |          |                                                                                                                                    |                      |
| Quotations presented                   | 29       | Were participant quotations presented to illustrate the themes/findings?<br>Was each quotation identified? e.g. participant number |                      |
| Data and findings consistent           | 30       | Was there consistency between the data presented and the findings?                                                                 |                      |
| Clarity of major themes                | 31       | Were major themes clearly presented in the findings?                                                                               |                      |
| Clarity of minor themes                | 32       | Is there a description of diverse cases or discussion of minor themes?                                                             |                      |

Developed from: Tong A, Sainsbury P, Craig J. Consolidated criteria for reporting qualitative research (COREQ): a 32-item checklist for interviews and focus groups. *International Journal for Quality in Health Care*. 2007. Volume 19, Number 6: pp. 349 – 357

**Once you have completed this checklist, please save a copy and upload it as part of your submission. DO NOT include this checklist as part of the main manuscript document. It must be uploaded as a separate file.**
